# Supplementary material
Source: PubMed Central journal article supplement (PMC4972272)
Supplement: supp_pp.16.00405_00405revsupp.pdf [file supp_pp.16.00405_00405revsupp.pdf]

**Supplemental Table 1. Expression of Auxin Response Genes Correlating with Hypocotyl Lengths in *SOB3* Mutants.** List of genes in four-day-old seedlings having an *R* value of greater than 0.8 or less than -0.8 based on correlation with hypocotyl phenotypes in six-day-old Col-0, *SOB3-D*, and *sob3-6* seedlings, also falling in the GO annotation category "Response to Auxin," based on PLAZA 3.0. Genes misregulated less than 2-fold in *SOB3-D*, as compared to *sob3-6*, as well as those not expressed in the wild-type, were excluded from analysis. The group was over-represented among GO terms, *p* = 0.000478. Asterisks indicate genes which were misregulated in the same direction based on the RNA-seq screen from six-day-old seedlings (Supplemental Table 2).

| AGI Number | Gene Name or Class         | <i>R</i> Value | Fold Change ( <i>sob3-6/SOB3-D</i> ) |
|------------|----------------------------|----------------|--------------------------------------|
| AT5G16530  | <i>PIN5</i>                | -1             | 0.317097077                          |
| AT2G36210  | <i>SAUR45</i>              | -0.99995       | 0.174403392                          |
| AT1G27740  | <i>RSL4</i>                | -0.99966       | 0.181986148                          |
| AT5G54490  | <i>PBP1</i>                | -0.99945       | 0.321975493                          |
| AT3G59610  | F-box Protein              | -0.99898       | Not Expressed in <i>sob3-6</i>       |
| AT3G20690  | F-box Protein              | -0.99898       | Not Expressed in <i>sob3-6</i>       |
| AT5G41490  | F-box Protein              | -0.99898       | Not Expressed in <i>sob3-6</i>       |
| AT3G22650  | <i>CEG/SFL61</i>           | -0.99898       | Not Expressed in <i>sob3-6</i>       |
| AT3G17620  | F-box Protein*             | -0.99898       | Not Expressed in <i>sob3-6</i>       |
| AT2G47260  | <i>WRKY23</i>              | -0.9988        | 0.328874968                          |
| AT3G44120  | F-box Protein              | -0.98569       | 0.369324831                          |
| AT4G05100  | <i>MYB74</i>               | -0.97934       | 0.416630326                          |
| AT3G53480  | <i>ABCG37/PDR9</i>         | -0.97743       | 0.485761596                          |
| AT1G23160  | GH3 Protein                | -0.97715       | 0.261605088                          |
| AT2G21220  | <i>SAUR12</i>              | -0.97675       | 0.116268928                          |
| AT1G57560  | <i>MYB50</i>               | -0.96516       | 0.465075713                          |
| AT3G11260  | <i>WOX5</i>                | -0.96328       | 0.160987747                          |
| AT4G16920  | Disease Resistance Protein | -0.96182       | 0.116268928                          |
| AT2G46530  | <i>ARF11</i>               | -0.95815       | 0.481481758                          |

|           |                     |          |                                |
|-----------|---------------------|----------|--------------------------------|
| AT4G37295 | Unknown             | -0.95579 | 0.184662415                    |
| AT4G22620 | <i>SAUR34</i>       | -0.94767 | Not Expressed in <i>sob3-6</i> |
| AT1G19220 | <i>ARF19/IAA22</i>  | -0.93911 | 0.44472865                     |
| AT5G10990 | <i>SAUR69*</i>      | -0.92894 | 0.041036092                    |
| AT1G24881 | F-box Protein       | -0.91026 | 0.202249312                    |
| AT1G48690 | GH3 Protein         | -0.88994 | 0.244906891                    |
| AT3G22700 | F-box Protein       | -0.86996 | Not Expressed in <i>sob3-6</i> |
| AT3G23420 | F-box Protein*      | -0.86996 | Not Expressed in <i>sob3-6</i> |
| AT1G54970 | <i>PRP1/RHS7</i>    | -0.86403 | 0.372801882                    |
| AT5G64890 | <i>PROPEP2</i>      | -0.83687 | Not Expressed in <i>sob3-6</i> |
| AT5G07990 | <i>CYP75B1/TT7</i>  | -0.83469 | 0.29727851                     |
| AT1G77850 | <i>ARF17</i>        | -0.82776 | 0.457173941                    |
| AT4G08040 | <i>ACS11</i>        | -0.82638 | 0.392407633                    |
| AT1G56150 | <i>SAUR71</i>       | -0.81941 | 0.348806785                    |
| AT3G13680 | F-box Protein       | -0.81941 | 0.348806785                    |
| AT3G28380 | <i>ABCB17/PGP17</i> | -0.80095 | Not Expressed in <i>sob3-6</i> |
| AT1G48670 | GH3 Protein*        | 0.8047   | Not Expressed in <i>SOB3-D</i> |
| AT5G18020 | <i>SAUR20*</i>      | 0.805682 | 2.478363996                    |
| AT5G43700 | <i>IAA4</i>         | 0.806903 | 2.34516902                     |
| AT4G12545 | 2S Albumin Protein  | 0.81242  | 2.031838624                    |
| AT3G54010 | <i>DEI1/PAS1</i>    | 0.822833 | 2.779202445                    |
| AT3G18320 | F-box Protein       | 0.82319  | 2.092840708                    |
| AT3G58190 | <i>ASL16/LBD29*</i> | 0.82989  | 3.139261061                    |
| AT5G18010 | <i>SAUR19*</i>      | 0.836298 | 4.839694136                    |
| AT1G15520 | <i>ABCG40/PDR12</i> | 0.862375 | 3.139261061                    |
| AT1G77110 | <i>PIN6</i>         | 0.874531 | 3.095660213                    |
| AT1G29420 | <i>SAUR61</i>       | 0.883303 | 6.278522123                    |
| AT4G32810 | <i>CCD8/MAX4</i>    | 0.888491 | 4.883294984                    |
| AT3G28210 | <i>PMZ/SAP12</i>    | 0.891675 | 2.092840708                    |

|           |                    |          |                                |
|-----------|--------------------|----------|--------------------------------|
| AT2G39550 | <i>GGB</i>         | 0.9059   | 2.134697522                    |
| AT2G28085 | <i>SAUR42*</i>     | 0.912291 | Not Expressed in <i>SOB3-D</i> |
| AT4G32280 | <i>IAA29*</i>      | 0.912676 | 11.2490188                     |
| AT1G56650 | <i>MYB75/PAP1</i>  | 0.9157   | 8.371362831                    |
| AT1G29450 | <i>SAUR64</i>      | 0.918421 | 18.83556637                    |
| AT2G21210 | <i>SAUR6</i>       | 0.920418 | 2.187672552                    |
| AT5G51470 | GH3 Protein        | 0.932347 | 3.40086615                     |
| AT1G24800 | F-box Protein      | 0.932415 | 5.493706858                    |
| AT3G01140 | <i>MYB106/NOK</i>  | 0.934234 | 4.924331077                    |
| AT4G16780 | <i>ATHB2/HAT4</i>  | 0.935168 | 4.407649369                    |
| AT3G17265 | F-box Protein      | 0.936635 | Not Expressed in <i>SOB3-D</i> |
| AT2G47190 | <i>MYB2</i>        | 0.948072 | Not Expressed in <i>SOB3-D</i> |
| AT5G14960 | <i>DEL2</i>        | 0.950345 | 2.616050885                    |
| AT5G18030 | <i>SAUR21*</i>     | 0.953773 | 2.67642129                     |
| AT2G19690 | <i>PLA2-BETA</i>   | 0.955374 | 13.25465782                    |
| AT3G15540 | <i>IAA19/MSG2*</i> | 0.95804  | 7.499345869                    |
| AT1G09540 | <i>MYB61</i>       | 0.96136  | 2.850593378                    |
| AT5G13820 | <i>TBP1</i>        | 0.961866 | 2.414816201                    |
| AT1G16510 | <i>SAUR41</i>      | 0.961924 | Not Expressed in <i>SOB3-D</i> |
| AT4G14550 | <i>IAA14/SLR</i>   | 0.964986 | 2.790454277                    |
| AT1G22640 | <i>MYB3</i>        | 0.965594 | 3.185426665                    |
| AT2G31180 | <i>MYB14</i>       | 0.968868 | 5.580908554                    |
| AT1G29490 | <i>SAUR68*</i>     | 0.969015 | Not Expressed in <i>SOB3-D</i> |
| AT3G03830 | <i>SAUR28</i>      | 0.971378 | 17.78914601                    |
| AT4G34770 | <i>SAUR1*</i>      | 0.972195 | 8.371362831                    |
| AT2G21200 | <i>SAUR7*</i>      | 0.972195 | 8.371362831                    |
| AT3G20710 | F-box Protein*     | 0.973159 | 2.092840708                    |
| AT3G17480 | F-box Protein      | 0.977269 | Not Expressed in <i>SOB3-D</i> |
| AT2G44990 | <i>CCD7/MAX3</i>   | 0.977269 | Not Expressed in <i>SOB3-D</i> |
| AT3G13830 | F-box Protein      | 0.977269 | Not Expressed in <i>SOB3-D</i> |

|           |                     |          |                                |
|-----------|---------------------|----------|--------------------------------|
| AT3G22730 | F-box Protein       | 0.977269 | Not Expressed in <i>SOB3-D</i> |
| AT4G33290 | F-box Protein*      | 0.977269 | Not Expressed in <i>SOB3-D</i> |
| AT3G28360 | <i>ABCB16/PGP16</i> | 0.977269 | Not Expressed in <i>SOB3-D</i> |
| AT1G35540 | <i>ARF14</i>        | 0.977269 | Not Expressed in <i>SOB3-D</i> |
| AT1G15580 | <i>IAA5</i>         | 0.977269 | Not Expressed in <i>SOB3-D</i> |
| AT1G11810 | F-box Protein       | 0.979512 | Not Expressed in <i>SOB3-D</i> |
| AT4G11280 | <i>ACS6</i>         | 0.980703 | 3.139261061                    |
| AT4G10100 | <i>CNX7/SIR5</i>    | 0.981477 | 3.041159153                    |
| AT3G62100 | <i>IAA30</i>        | 0.985414 | 3.139261061                    |
| AT2G22240 | <i>MIPS2</i>        | 0.985833 | 2.017648826                    |
| AT4G02980 | <i>ABP1</i>         | 0.986698 | 2.014359181                    |
| AT1G71230 | <i>AJH2/CSN5B</i>   | 0.990394 | 6.600497616                    |
| AT2G26700 | <i>PID2</i>         | 0.991002 | 3.461236555                    |
| AT5G18060 | <i>SAUR23*</i>      | 0.993555 | 8.109757742                    |
| AT3G03820 | <i>SAUR29</i>       | 0.99382  | 12.55704425                    |
| AT1G05180 | <i>AXR1</i>         | 0.994364 | 2.012346834                    |
| AT1G59500 | <i>GH3.4</i>        | 0.994558 | Not Expressed in <i>SOB3-D</i> |
| AT1G15050 | <i>IAA34</i>        | 0.994558 | Not Expressed in <i>SOB3-D</i> |
| AT3G61510 | <i>ACS1*</i>        | 0.994558 | Not Expressed in <i>SOB3-D</i> |
| AT5G66700 | <i>HB53</i>         | 0.995082 | 3.662471238                    |
| AT1G19640 | <i>JMT</i>          | 0.995109 | 8.371362831                    |
| AT1G29460 | <i>SAUR65</i>       | 0.995853 | 3.371798918                    |
| AT5G18050 | <i>SAUR22*</i>      | 0.996315 | 28.77655973                    |
| AT5G18080 | <i>SAUR24</i>       | 0.99707  | Not Expressed in <i>sob3-6</i> |
| AT4G38825 | <i>SAUR13*</i>      | 0.99707  | Not Expressed in <i>SOB3-D</i> |
| AT5G50120 | WD40 Repeat Protein | 0.997117 | 2.72069292                     |
| AT1G18570 | <i>MYB51</i>        | 0.998156 | 2.24232933                     |
| AT1G19180 | <i>JAZ1</i>         | 0.998259 | 2.092840708                    |
| AT5G47370 | <i>HAT2</i>         | 0.998562 | 2.181752241                    |

|           |                    |          |                                |
|-----------|--------------------|----------|--------------------------------|
| AT5G13320 | <i>GH3.12/WIN3</i> | 0.998632 | Not Expressed in <i>SOB3-D</i> |
| AT2G01200 | <i>IAA32</i>       | 0.998654 | 10.46420354                    |
| AT5G42460 | F-box Protein      | 0.99869  | 2.588513507                    |
| AT1G29500 | <i>SAUR66*</i>     | 0.998886 | 4.668644656                    |
| AT3G23260 | F-box Protein      | 0.999087 | Not Expressed in <i>SOB3-D</i> |
| AT3G15500 | <i>NAC3</i>        | 0.999091 | 3.836874631                    |
| AT4G14560 | <i>AXR5/IAA1</i>   | 0.999355 | 5.115832841                    |
| AT5G20820 | <i>SAUR76</i>      | 0.999636 | 7.324942477                    |
| AT1G48660 | GH3 Protein        | 0.999723 | 3.662471238                    |
| AT2G17830 | F-box Protein      | 0.999762 | 2.232363421                    |
| AT2G27690 | <i>CYP94C1</i>     | 0.999829 | 6.069238052                    |
| AT4G37770 | <i>ACS8*</i>       | 1        | Not Expressed in <i>SOB3-D</i> |
| AT2G44840 | <i>ERF13</i>       | 1        | Not Expressed in <i>SOB3-D</i> |
| AT1G29440 | <i>SAUR63</i>      | 1        | 3.780615472                    |

**Supplemental Table 2. Auxin Response Genes Misregulated in *SOB3-D* at Six Days.** List of genes, based on RNA-seq data from six-day-old seedlings, misregulated at least 5-fold in *SOB3-D*, as compared to Col-0, with GO annotation "Response to Auxin," based on PLAZA 3.0. The group was over-represented among GO terms,  $p = 0.0038$ . Asterisks indicate genes which were misregulated in the same direction based on the RNA-seq screen from four-day-old seedlings (Supplemental Table 1).

| <b>AGI Number</b> | <b>Gene Name or Class</b> | <b>Fold Change (<i>SOB3-D</i>/Col-0)</b> |
|-------------------|---------------------------|------------------------------------------|
| AT3G49700         | <i>ACS9</i>               | Not Expressed in <i>SOB3-D</i>           |
| AT3G59900         | <i>ARGOS</i>              | Not Expressed in <i>SOB3-D</i>           |
| AT1G12190         | F-box Protein             | Not Expressed in <i>SOB3-D</i>           |
| AT1G25141         | F-box Protein             | Not Expressed in <i>SOB3-D</i>           |
| AT1G31510         | F-box Protein             | Not Expressed in <i>SOB3-D</i>           |
| AT1G32430         | F-box Protein             | Not Expressed in <i>SOB3-D</i>           |
| AT1G47390         | F-box Protein             | Not Expressed in <i>SOB3-D</i>           |
| AT1G51290         | F-box Protein             | Not Expressed in <i>SOB3-D</i>           |
| AT1G54550         | F-box Protein             | Not Expressed in <i>SOB3-D</i>           |
| AT1G65990         | F-box Protein             | Not Expressed in <i>SOB3-D</i>           |
| AT1G66490         | F-box Protein             | Not Expressed in <i>SOB3-D</i>           |
| AT1G67450         | F-box Protein             | Not Expressed in <i>SOB3-D</i>           |
| AT2G24510         | F-box Protein             | Not Expressed in <i>SOB3-D</i>           |
| AT3G04250         | F-box Protein             | Not Expressed in <i>SOB3-D</i>           |
| AT3G16590         | F-box Protein             | Not Expressed in <i>SOB3-D</i>           |
| AT3G17560         | F-box Protein             | Not Expressed in <i>SOB3-D</i>           |
| AT3G17570         | F-box Protein             | Not Expressed in <i>SOB3-D</i>           |
| AT3G18330         | F-box Protein             | Not Expressed in <i>SOB3-D</i>           |
| AT3G21120         | F-box Protein             | Not Expressed in <i>SOB3-D</i>           |
| AT3G22770         | F-box Protein             | Not Expressed in <i>SOB3-D</i>           |
| AT3G24580         | F-box Protein             | Not Expressed in <i>SOB3-D</i>           |
| AT3G25090         | F-box Protein             | Not Expressed in <i>SOB3-D</i>           |

|           |                   |                                |
|-----------|-------------------|--------------------------------|
| AT3G59590 | F-box Protein     | Not Expressed in <i>SOB3-D</i> |
| AT3G59610 | F-box Protein     | Not Expressed in <i>SOB3-D</i> |
| AT4G04690 | F-box Protein     | Not Expressed in <i>SOB3-D</i> |
| AT5G41490 | F-box Protein     | Not Expressed in <i>SOB3-D</i> |
| AT5G60560 | F-box Protein     | Not Expressed in <i>SOB3-D</i> |
| AT4G33290 | F-box Protein*    | Not Expressed in <i>SOB3-D</i> |
| AT1G48670 | GH3 Protein*      | Not Expressed in <i>SOB3-D</i> |
| AT5G57420 | <i>IAA33</i>      | Not Expressed in <i>SOB3-D</i> |
| AT2G21220 | <i>SAUR12</i>     | Not Expressed in <i>SOB3-D</i> |
| AT4G13790 | <i>SAUR25</i>     | Not Expressed in <i>SOB3-D</i> |
| AT2G28085 | <i>SAUR42*</i>    | Not Expressed in <i>SOB3-D</i> |
| AT2G37030 | <i>SAUR46</i>     | Not Expressed in <i>SOB3-D</i> |
| AT1G19840 | <i>SAUR53</i>     | Not Expressed in <i>SOB3-D</i> |
| AT1G29490 | <i>SAUR68*</i>    | Not Expressed in <i>SOB3-D</i> |
| AT1G56150 | <i>SAUR71</i>     | Not Expressed in <i>SOB3-D</i> |
| AT3G03847 | <i>SAUR73</i>     | Not Expressed in <i>SOB3-D</i> |
| AT4G36110 | <i>SAUR9</i>      | Not Expressed in <i>SOB3-D</i> |
| AT1G61120 | <i>TPS4</i>       | Not Expressed in <i>SOB3-D</i> |
| AT4G37295 | Unknown           | Not Expressed in <i>SOB3-D</i> |
| AT2G22810 | <i>ACS4</i>       | 0.020080982                    |
| AT4G37770 | <i>ACS8*</i>      | 0.021614946                    |
| AT4G38825 | <i>SAUR13*</i>    | 0.045240584                    |
| AT4G32280 | <i>IAA29*</i>     | 0.052735259                    |
| AT1G29510 | <i>SAUR67</i>     | 0.058992415                    |
| AT5G18050 | <i>SAUR22*</i>    | 0.061431951                    |
| AT5G18060 | <i>SAUR23*</i>    | 0.06865924                     |
| AT1G52830 | <i>IAA6/SHY1</i>  | 0.070739823                    |
| AT1G29430 | <i>SAUR62</i>     | 0.073955269                    |
| AT5G13220 | <i>JAS1/JAZ10</i> | 0.084123032                    |
| AT5G18010 | <i>SAUR19*</i>    | 0.1174548                      |

|           |                        |                     |
|-----------|------------------------|---------------------|
| AT4G34770 | <i>SAUR1*</i>          | 0.122863902         |
| AT5G18030 | <i>SAUR21*</i>         | 0.137153829         |
| AT3G15540 | <i>IAA19/MSG2*</i>     | 0.143955539         |
| AT5G18020 | <i>SAUR20*</i>         | 0.148360951         |
| AT3G53250 | <i>SAUR57</i>          | 0.149641932         |
| AT3G43120 | <i>SAUR39</i>          | 0.15562761          |
| AT1G34410 | <i>ARF21</i>           | 0.15562761          |
| AT2G18010 | <i>SAUR10</i>          | 0.162112093         |
| AT3G20710 | F-box Protein*         | 0.163818537         |
| AT2G21200 | <i>SAUR7*</i>          | 0.166743868         |
| AT3G58190 | <i>ASL16/LBD29*</i>    | 0.172919566         |
| AT4G38850 | <i>SAUR15/SAUR-AC1</i> | 0.184075667         |
| AT3G17600 | <i>IAA31</i>           | 0.194534512         |
| AT3G61510 | <i>ACS1*</i>           | 0.194534512         |
| AT3G03840 | <i>SAUR27</i>          | 0.198348914         |
| AT1G29500 | <i>SAUR66*</i>         | 0.198570498         |
| AT5G59220 | <i>HAI1/SAG113</i>     | 5.031248754         |
| AT3G51171 | F-box Protein          | 5.446966341         |
| AT3G23250 | <i>MYB15</i>           | 6.030569878         |
| AT5G66700 | <i>HB53</i>            | 6.22510439          |
| AT3G28390 | <i>ABCB18/PGP18</i>    | 6.22510439          |
| AT2G24850 | <i>TAT3</i>            | 7.003242439         |
| AT2G35270 | <i>AHL21/GIK</i>       | 8.429828861         |
| AT1G53940 | <i>GLIP2</i>           | 9.251196802         |
| AT4G12410 | <i>SAUR35</i>          | 14.78462293         |
| AT1G51190 | <i>PLT2</i>            | 34.23807414         |
| AT1G35240 | <i>ARF20</i>           | Not Expressed in WT |
| AT1G12980 | <i>DRN/ESR1</i>        | Not Expressed in WT |
| AT1G12170 | F-box Protein          | Not Expressed in WT |

|           |                |                     |
|-----------|----------------|---------------------|
| AT1G77650 | F-box Protein  | Not Expressed in WT |
| AT2G14710 | F-box Protein  | Not Expressed in WT |
| AT2G27520 | F-box Protein  | Not Expressed in WT |
| AT3G13820 | F-box Protein  | Not Expressed in WT |
| AT3G13830 | F-box Protein  | Not Expressed in WT |
| AT3G14030 | F-box Protein  | Not Expressed in WT |
| AT3G17500 | F-box Protein  | Not Expressed in WT |
| AT3G17530 | F-box Protein  | Not Expressed in WT |
| AT3G18340 | F-box Protein  | Not Expressed in WT |
| AT3G20700 | F-box Protein  | Not Expressed in WT |
| AT3G22350 | F-box Protein  | Not Expressed in WT |
| AT3G22720 | F-box Protein  | Not Expressed in WT |
| AT3G22940 | F-box Protein  | Not Expressed in WT |
| AT3G44130 | F-box Protein  | Not Expressed in WT |
| AT3G49520 | F-box Protein  | Not Expressed in WT |
| AT4G05080 | F-box Protein  | Not Expressed in WT |
| AT5G37040 | F-box Protein  | Not Expressed in WT |
| AT5G41500 | F-box Protein  | Not Expressed in WT |
| AT3G17620 | F-box Protein* | Not Expressed in WT |
| AT3G23420 | F-box Protein* | Not Expressed in WT |
| AT5G13380 | GH3 Protein    | Not Expressed in WT |
| AT5G40990 | <i>GLIP1</i>   | Not Expressed in WT |
| AT1G80390 | <i>IAA15</i>   | Not Expressed in WT |
| AT2G46990 | <i>IAA20</i>   | Not Expressed in WT |
| AT1G15050 | <i>IAA34</i>   | Not Expressed in WT |
| AT2G47190 | <i>MYB2</i>    | Not Expressed in WT |
| AT5G15100 | <i>PIN8</i>    | Not Expressed in WT |
| AT4G09530 | <i>SAUR17</i>  | Not Expressed in WT |
| AT5G03310 | <i>SAUR44</i>  | Not Expressed in WT |
| AT5G10990 | <i>SAUR69*</i> | Not Expressed in WT |

|           |             |                     |
|-----------|-------------|---------------------|
| AT2G17310 | <i>SON1</i> | Not Expressed in WT |
|-----------|-------------|---------------------|

**Supplemental Table 3: Misregulated *SAUR* Genes in *SOB3-D* Based on RNA-seq at Six Days.** Ratios of RPKM expression values in seedlings grown under constant dim white light (Supplemental Data Set 2). *SAUR* genes showing at least a five-fold change in expression are listed.

| Gene          | Fold Change ( <i>SOB3-D</i> /Col-0) |
|---------------|-------------------------------------|
| <i>SAUR17</i> | Not Expressed in WT                 |
| <i>SAUR44</i> | Not Expressed in WT                 |
| <i>SAUR69</i> | Not Expressed in WT                 |
| <i>SAUR35</i> | 14.78462293                         |
| <i>SAUR66</i> | 0.198570498                         |
| <i>SAUR27</i> | 0.198348914                         |
| <i>SAUR15</i> | 0.184075667                         |
| <i>SAUR7</i>  | 0.166743868                         |
| <i>SAUR10</i> | 0.162112093                         |
| <i>SAUR39</i> | 0.15562761                          |
| <i>SAUR57</i> | 0.149641932                         |
| <i>SAUR20</i> | 0.148360951                         |
| <i>SAUR21</i> | 0.137153829                         |
| <i>SAUR1</i>  | 0.122863902                         |
| <i>SAUR19</i> | 0.1174548                           |

|               |                                |
|---------------|--------------------------------|
| <i>SAUR62</i> | 0.073955269                    |
| <i>SAUR23</i> | 0.06865924                     |
| <i>SAUR22</i> | 0.061431951                    |
| <i>SAUR67</i> | 0.058992415                    |
| <i>SAUR13</i> | 0.045240584                    |
| <i>SAUR9</i>  | Not Expressed in <i>SOB3-D</i> |
| <i>SAUR12</i> | Not Expressed in <i>SOB3-D</i> |
| <i>SAUR25</i> | Not Expressed in <i>SOB3-D</i> |
| <i>SAUR42</i> | Not Expressed in <i>SOB3-D</i> |
| <i>SAUR46</i> | Not Expressed in <i>SOB3-D</i> |
| <i>SAUR53</i> | Not Expressed in <i>SOB3-D</i> |
| <i>SAUR68</i> | Not Expressed in <i>SOB3-D</i> |
| <i>SAUR71</i> | Not Expressed in <i>SOB3-D</i> |
| <i>SAUR73</i> | Not Expressed in <i>SOB3-D</i> |

**Supplemental Table 4: Primers Used for qRT-PCR and ChIP-qPCR.**

**qRT-PCR**

|                                                                                      | <b>Forward Primer</b>                   | <b>Reverse Primer</b>                    |
|--------------------------------------------------------------------------------------|-----------------------------------------|------------------------------------------|
| <i>SAUR19</i>                                                                        | 5'- GCTCTCATACTTGAG<br>CCAACCG -3'      | 5'- AGGGATCGTTAAGCC<br>ACCCATC -3'       |
| <i>SAUR20</i>                                                                        | 5'- CGATCATCCAATGG<br>GTGGCT -3'        | 5'-GCTCATCATCGTTGG<br>AACCG -3'          |
| <i>SAUR22</i>                                                                        | 5'- TGTGACTTCTCGGC<br>TCCAAT -3'        | 5'- CAAAAATGGCATCCAT<br>TCTCTAAAC -3'    |
| <i>SAUR24</i>                                                                        | 5'- ACCAGCCTTCATTT<br>CAAGCTCTTC -3'    | 5'- AGGGATCGTTAAGCC<br>TCCCATC -3'       |
| <i>SAUR28</i>                                                                        | 5'-AGCAAGAACGAGC<br>AAAGCAC -3'         | 5'-CAAATTGTCAAGCCG<br>CCCAT -3'          |
| <i>SAUR57</i>                                                                        | 5'-CCGAGAGGACATT<br>TGGTAGTG -3'        | 5'- TGCAACGAACAACAT<br>CGAGA -3'         |
| <i>SAUR62</i>                                                                        | 5'- GTGCTACTCAACAG<br>TTGCTTGT -3'      | 5'- TGAGACAACTTAAAT<br>GAGAGACCA -3'     |
| <i>SAUR63</i>                                                                        | 5'-ATTTCGGTCTCCCA<br>ACGGAA -3'         | 5'- ACTACATTGTTGTTCT<br>TGTGGTTG -3'     |
| <i>SAUR66</i>                                                                        | 5'- GGAAATGGCAACA<br>GAGAGCA -3'        | 5'- GCCGTGTAAACGAC<br>AAAGCAT -3'        |
| <i>YUC8</i>                                                                          | 5'- GAGGAAAGGGCTC<br>TCAGGTG -3'        | 5'- GAAGAGAACCCCTT<br>GAGCGT -3'         |
| <i>UBQ10</i>                                                                         | 5'- GGCCTTGTATAATC<br>CCTGATGAATAAG -3' | 5'- AAAGAGATAACAGGA<br>ACGGAAACATAGT -3' |
| <i>PP2AA3-<br/>lwase A, et al. (2011)<br/>Current biology: CB<br/>21(6):508-514.</i> | 5'- GACCAAGTGAACC<br>AGGTTATTGG -3'     | 5'- TACTCTCCAGTGCCT<br>GTCTTCA -3'       |

*MDAR4-*  
Hruz T, *et al.* (2011)  
*BMC genomics* 12:156.

5'- GCGGTGGCTATAT  
CGGTATGG -3'

5'- AAAGAGACGTGCCA  
TGCAGTG -3'

*PMP-*  
Hruz T, *et al.* (2011)  
*BMC genomics* 12:156

5'- ATATCAGACAGGCA  
GTCAGCG -3'

5'- TGCTAAAGCATCGAT  
ACCACC -3'

### **ChIP-qPCR**

#### **Forward Primer**

#### **Reverse Primer**

*SAUR19* Promoter  
P1

5'-TGCAAGAACAAAG  
ACAGCAGG -3'

5'- ACATTCAGGTCCCCA  
CTTTAACT -3'

*SAUR19* Promoter  
P2

5'- TTTAGCACTCCCTG  
AGCGAA -3'

5'-TCACGTTAGCATCTG  
GACGAC -3'

*SAUR20/21*  
Promoter P1

5'- TTGCTGGGCCTTCT  
TATTGACA -3'

5'- TGAGTTTGGGCCAAT  
AAACGA -3'

*SAUR20/21*  
Promoter P2

5'-CCATATGCAATTCA  
CAAGGGACTG -3'

5'- CATGGAGAAGAGAAA  
CTTGCTGG -3'

*SAUR22/23*  
Promoter

5'-AGCTATGCCAAGCT  
CTTGCT -3'

5'- GAAGCGTGGGACAG  
AGTTCA -3'

*IAA29* Intragenic  
Sequence

5'- GACGTTTGGGTTA  
GGGAATGTGG -3'

5'- GACTCGGATTCCAG  
AGGATCTTC -3'

*YUC8* Promoter P1

5'- ACAACTCTAAGCAA  
TCATACTACA -3'

5'- AGAGATCCCATGTG  
GCGTTG -3'

*YUC8* Promoter P2

5'- TTCCTCTCGTTGGT  
CCCACA -3'

5'-TGGTTAGAGAAGGG  
AAGTGATGG -3'

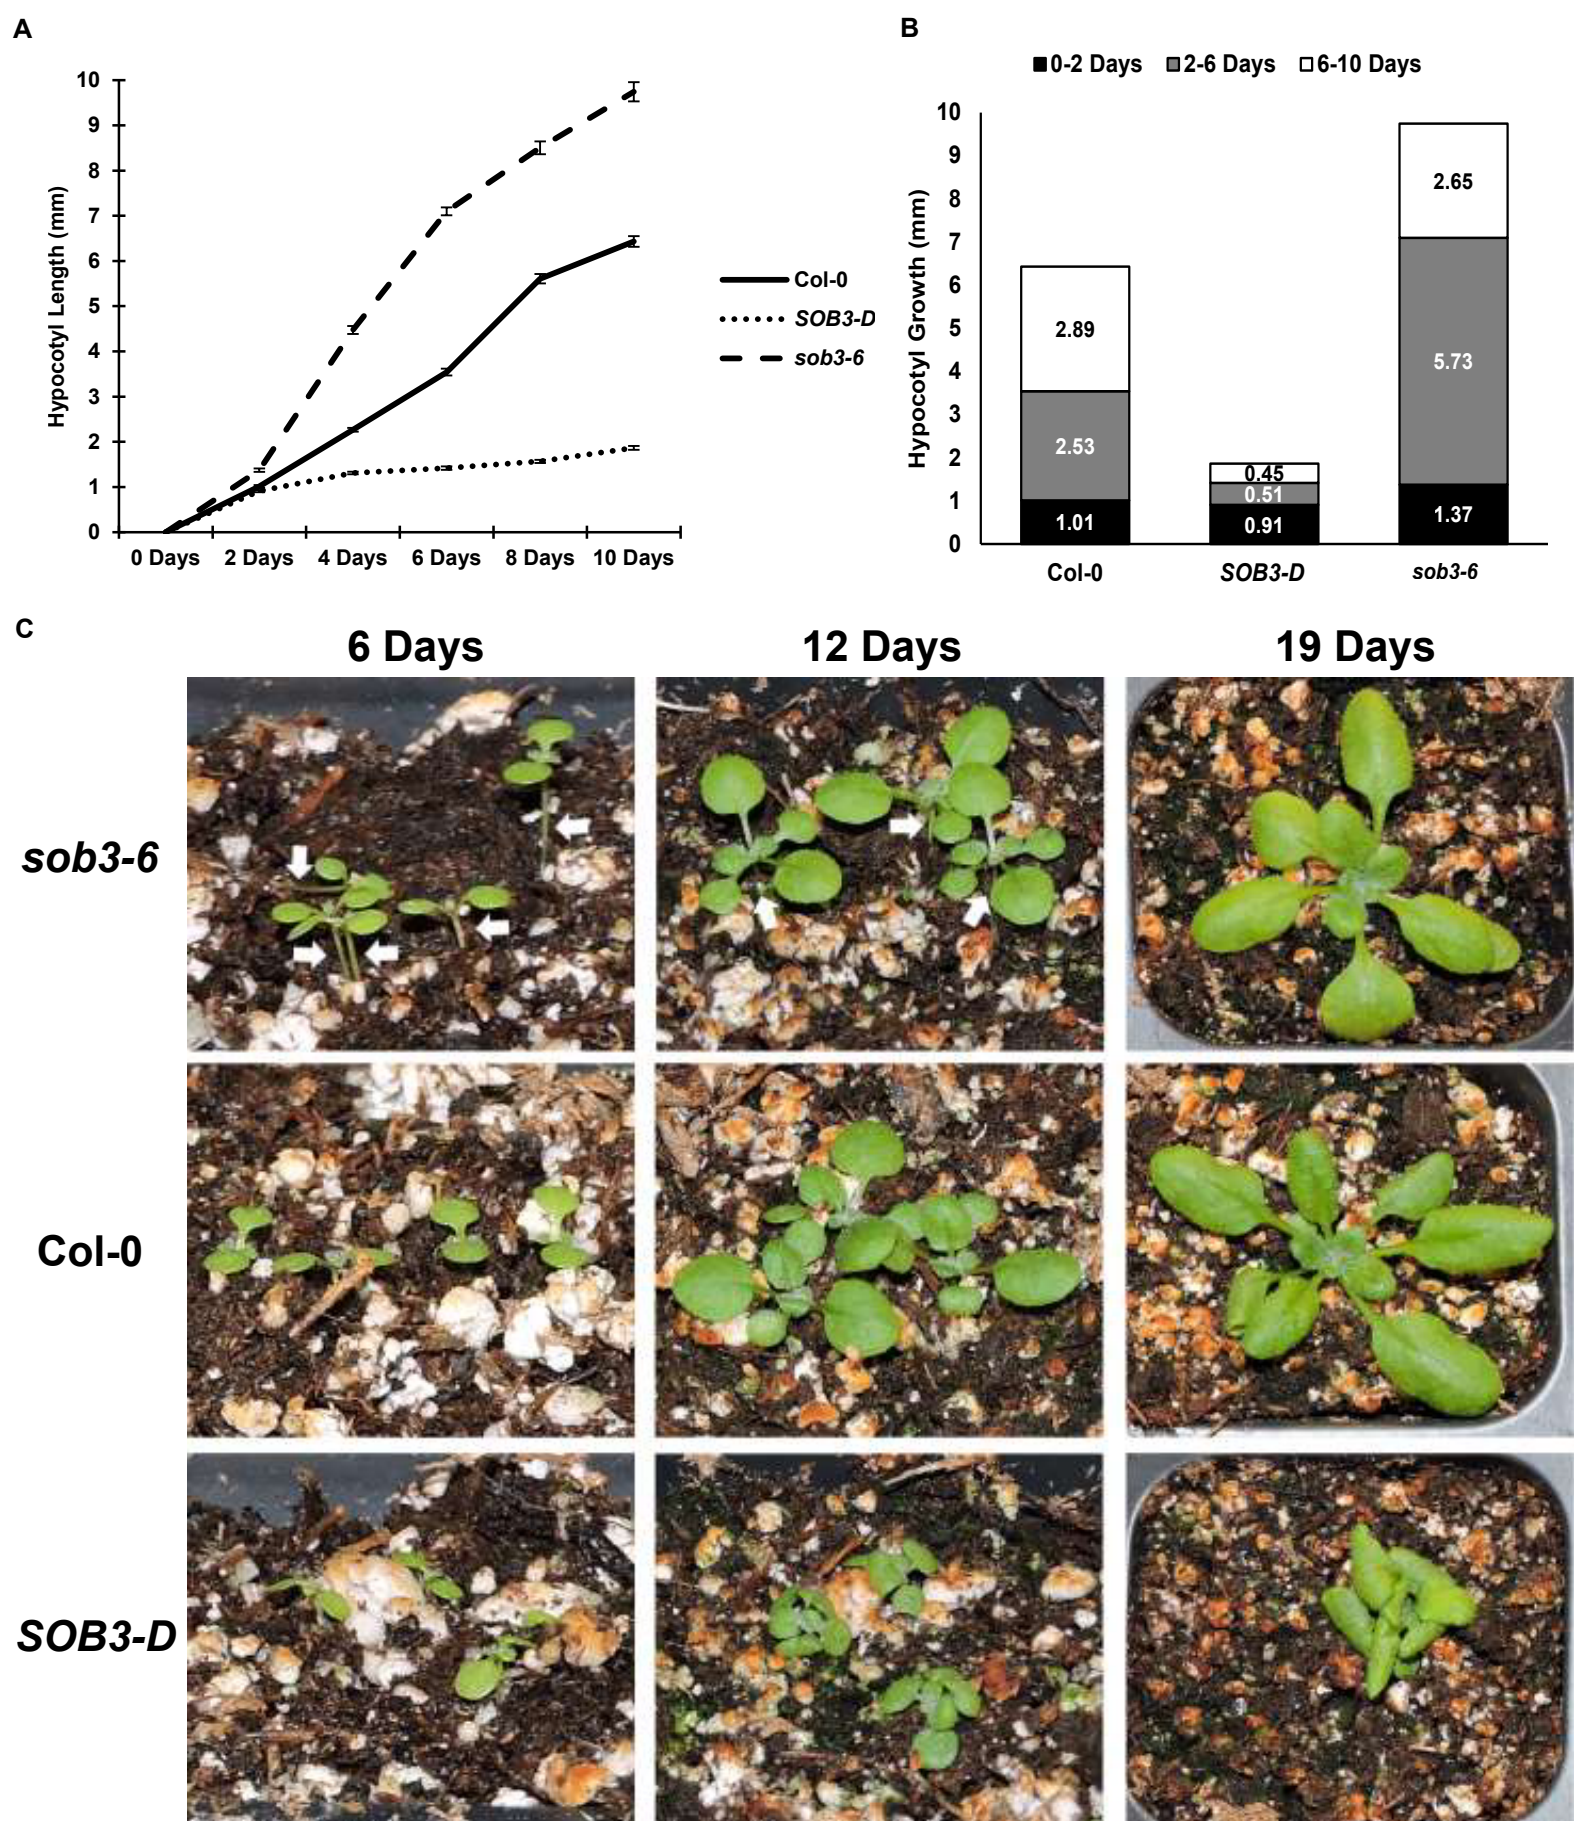

**Supplemental Figure 1: *Sob3-6* does Not Affect Development After Day Six.** **A** - Hypocotyl elongation assays at various time points. Seedlings were grown on LS media and harvested for hypocotyl measurements at the indicated time points. Error bars represent standard error of the mean. 2 days- Col-0,  $n = 73$ ; *SOB3-D*,  $n = 76$ ; *sob3-6*,  $n = 63$ . 4 days- Col-0,  $n = 78$ ; *SOB3-D*,  $n = 69$ ; *sob3-6*,  $n = 75$ . 6 days- Col-0,  $n = 74$ ; *SOB3-D*,  $n = 73$ ; *sob3-6*,  $n = 78$ . 8 days- Col-0,  $n = 63$ ; *SOB3-D*,  $n = 83$ ; *sob3-6*,  $n = 72$ . 10 days- Col-0,  $n = 65$ ; *SOB3-D*,  $n = 69$ ; *sob3-6*,  $n = 60$ . **B** - Hypocotyl growth by time period. Values represent hypocotyl growth in mm during the indicated intervals for the seedlings measured in A. **C** - Phenotypes in soil-grown mutants. Plants were grown in long-day conditions with a moderate intensity of white light supplied during the day. White arrows point to tall, exposed hypocotyls observed in *sob3-6*.

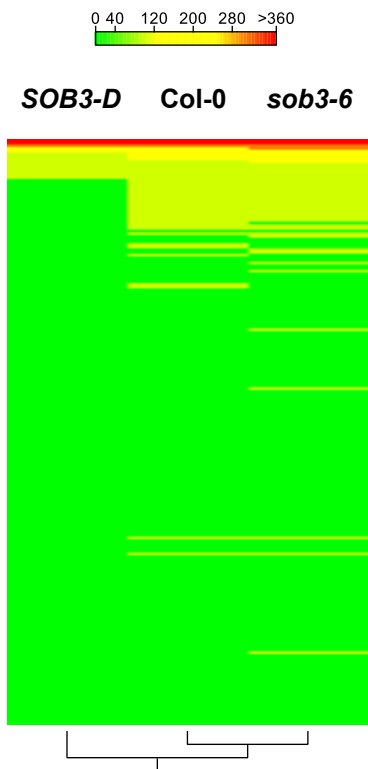

**Supplemental Figure 2: Hierarchical Clustering of RNA-seq Data.** Analysis is based on RPKM values for the data from four-day-old seedlings, presented in Supplemental Data Set 1.

A

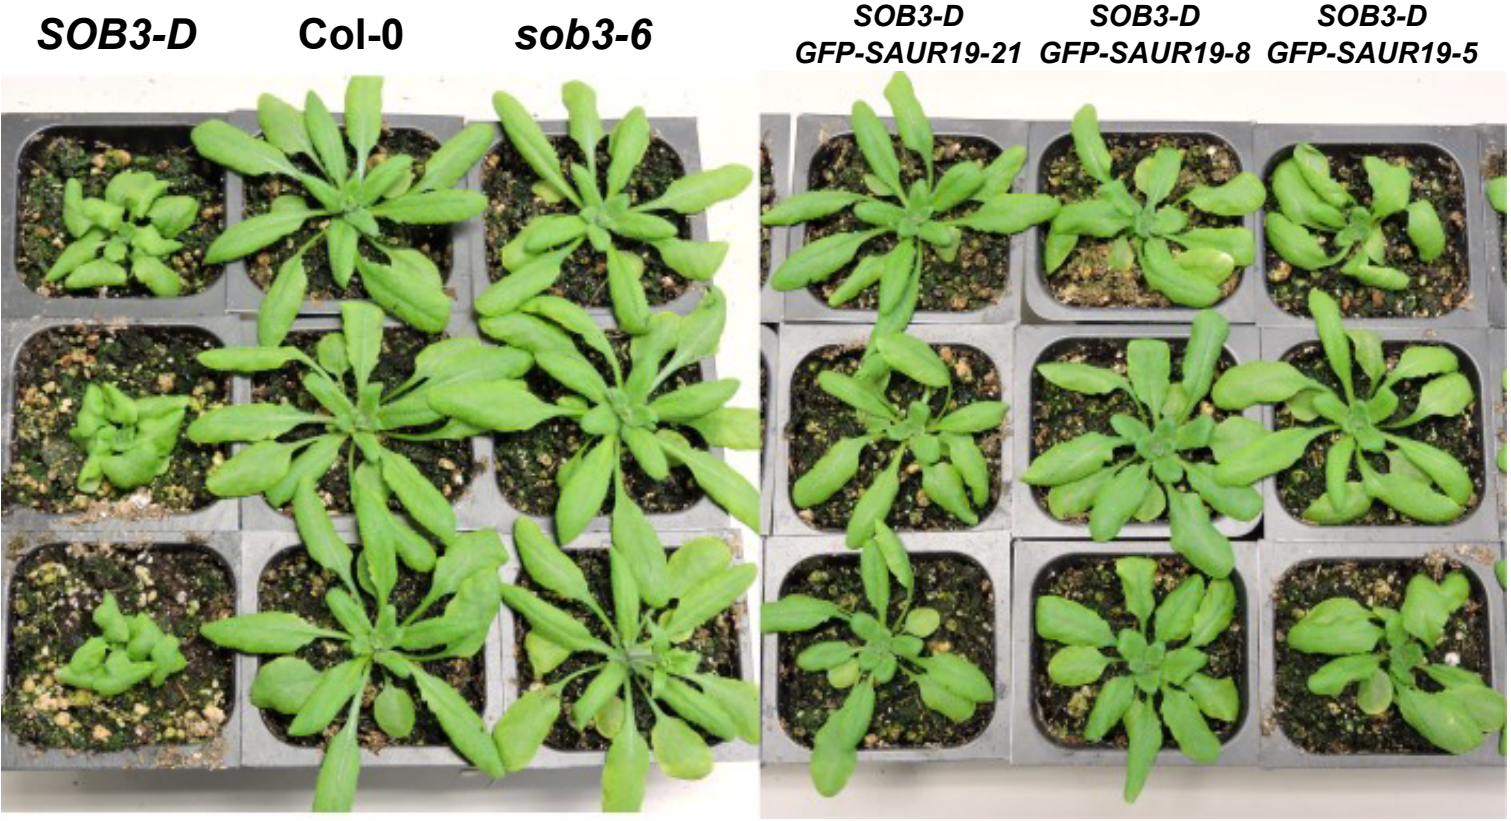

B

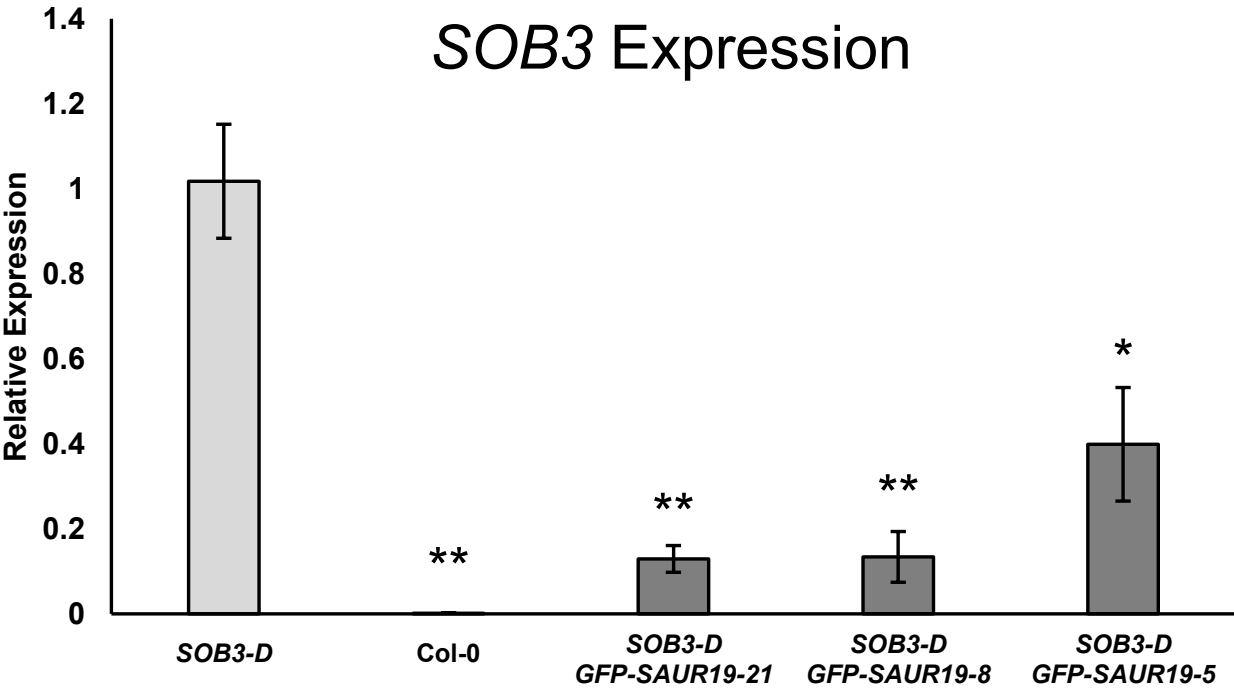

**Supplemental Figure 3: Rosette Phenotypes in *SOB3* Mutants and *SOB3-D/GFP-SAUR19* Double Transgenic Lines.** **A** - 26-day-old rosettes. *SOB3-D* and *sob3-6* lines are homozygous, and all *SOB3-D/GFP-SAUR19* lines are homozygous for the *SOB3-D* locus. In regards to the *GFP-SAUR19* transgene, these lines are segregating T2 generation plants. All plants were grown in long-day conditions under a moderate light intensity. **B** - *SOB3* expression in rosette leaves. Expression levels were analyzed via qRT-PCR using the plants for the indicated lines pictured in A at 28 days. Transcript levels are normalized based on the expression of the *MDAR4* housekeeping gene. All values are shown as fold change compared to *SOB3-D*. Error bars represent standard error of the mean for three biological replicates. In a Welch's *t*-test (unpaired one-tailed *t*-test with unequal variance) compared to *SOB3-D* \**P* < 0.05. \*\* *P* < 0.01.

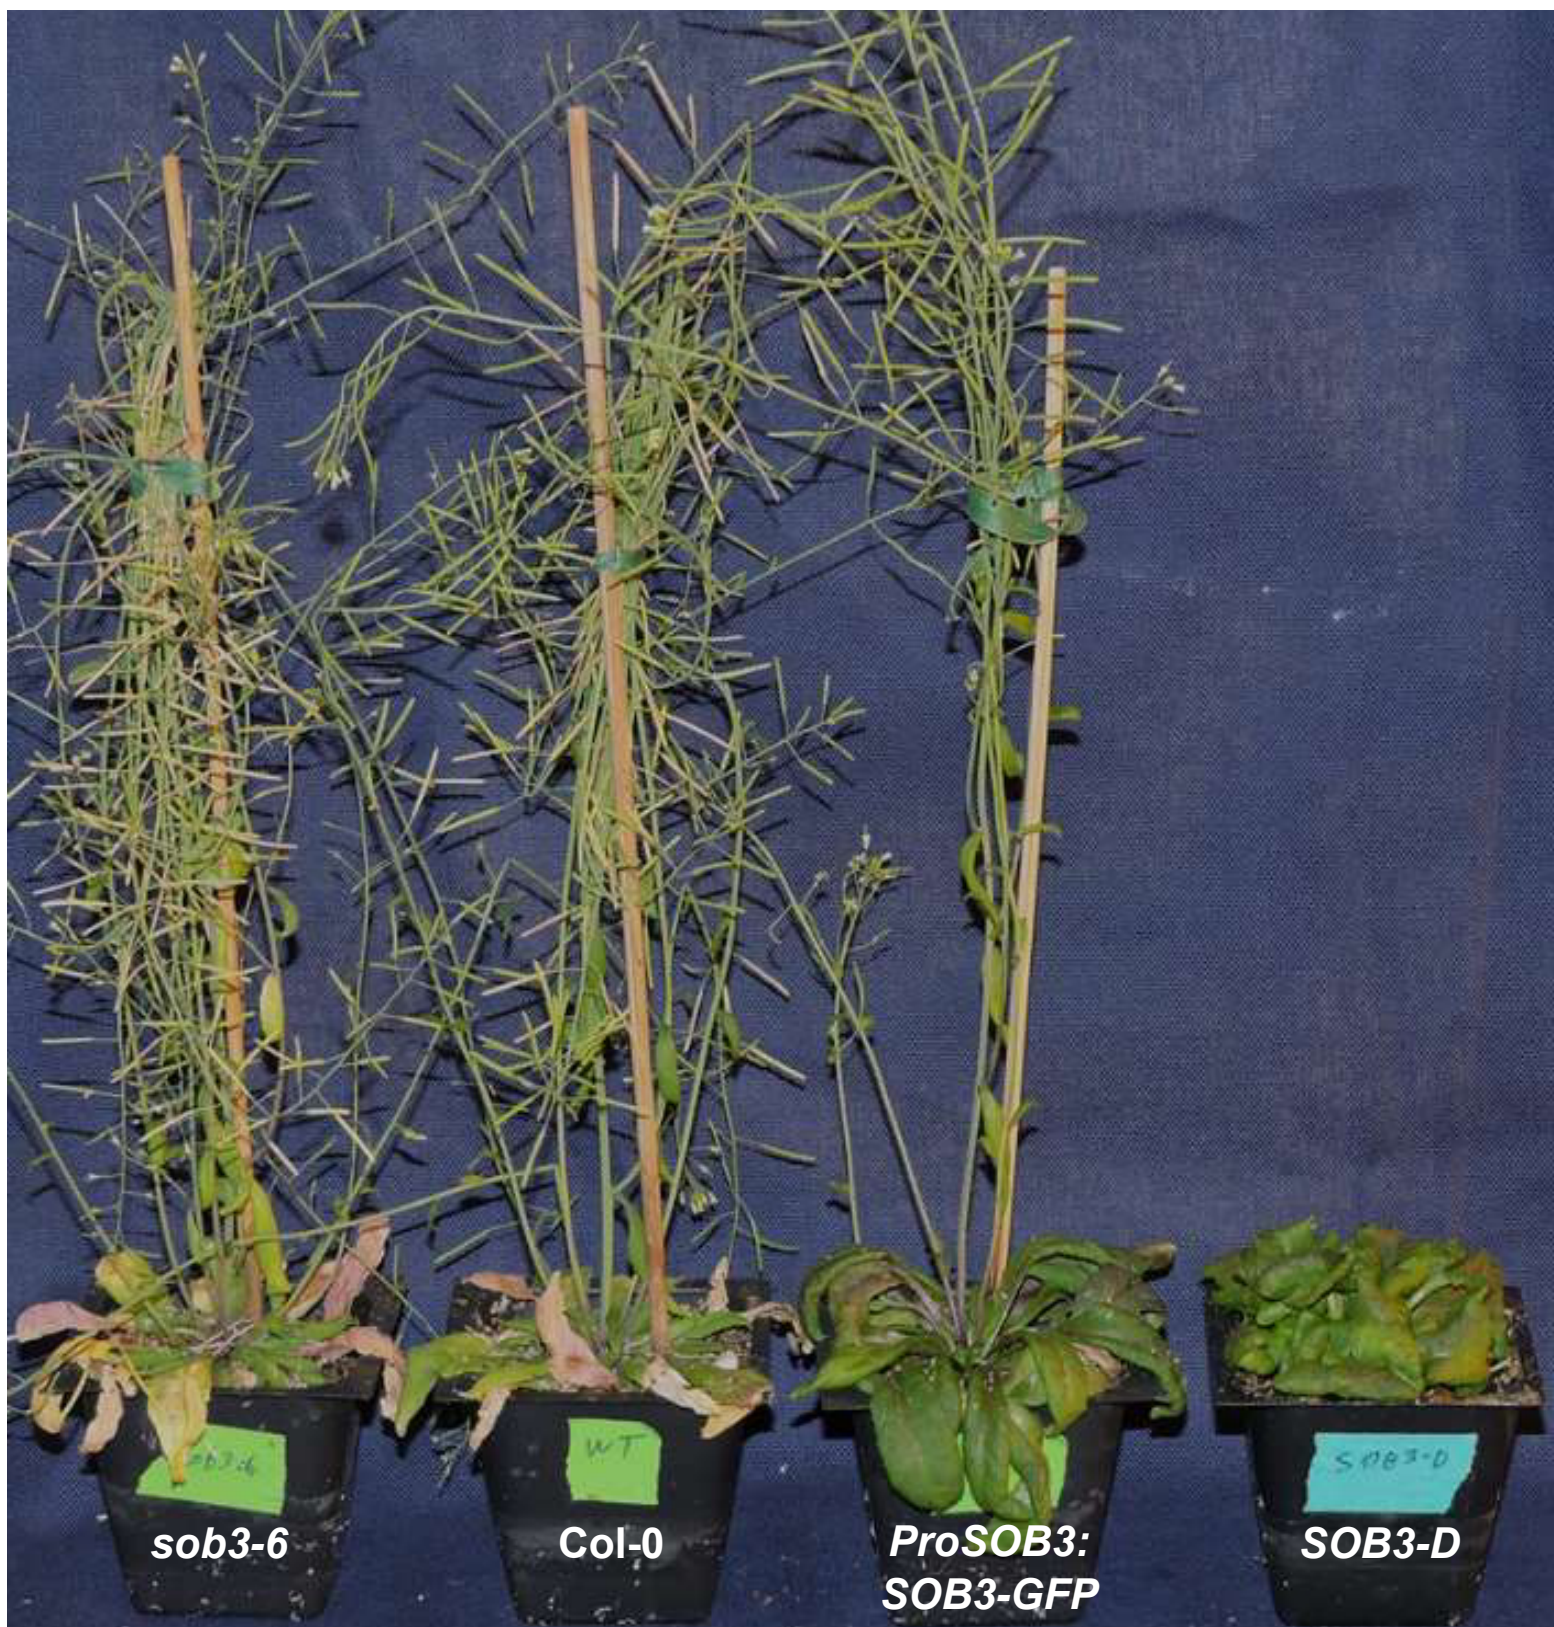

**Supplemental Figure 4: Phenotypes in 55-day-old *SOB3* Mutants.** All plants were grown in long-day conditions under a moderate light intensity. Mutants are homozygous.

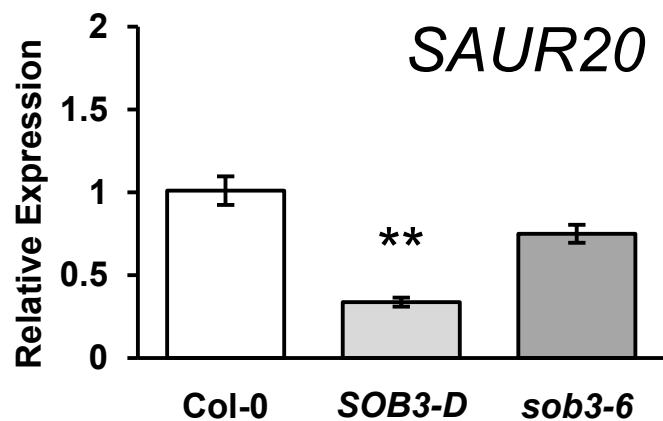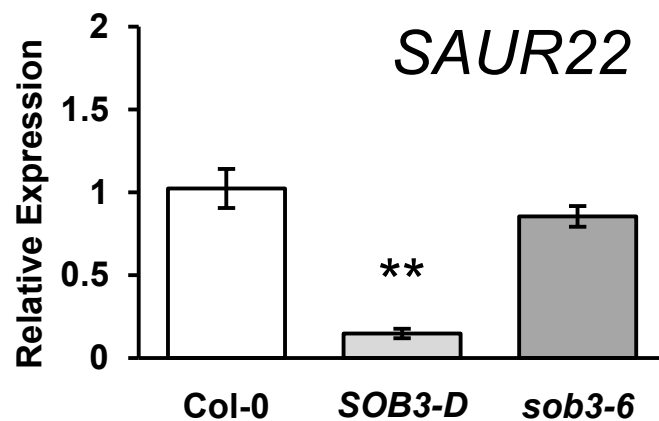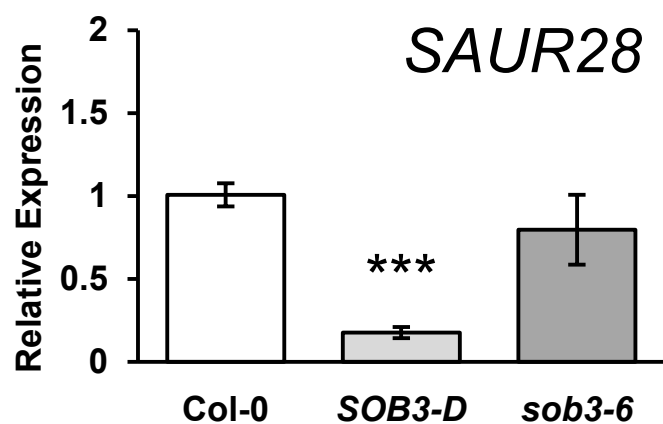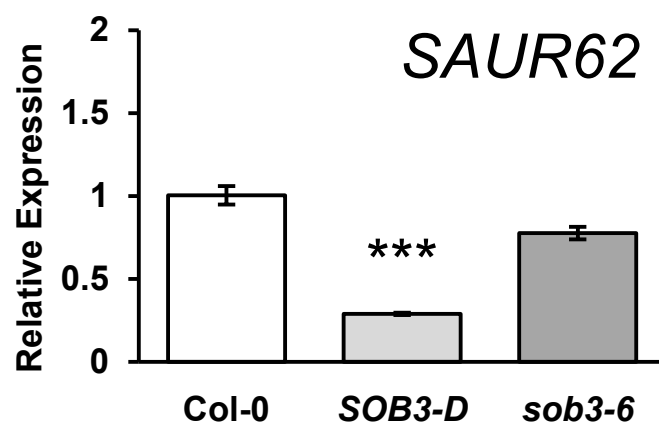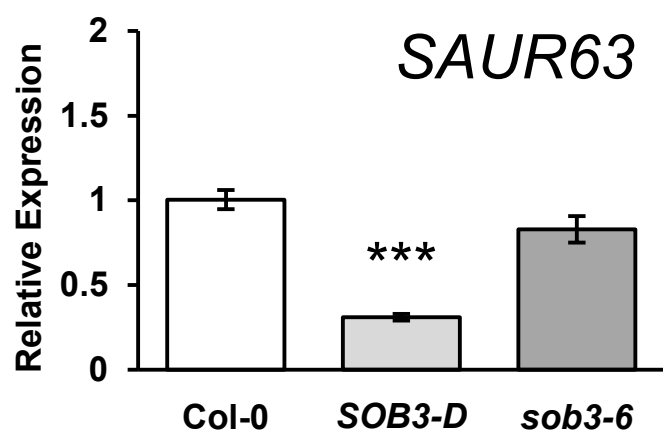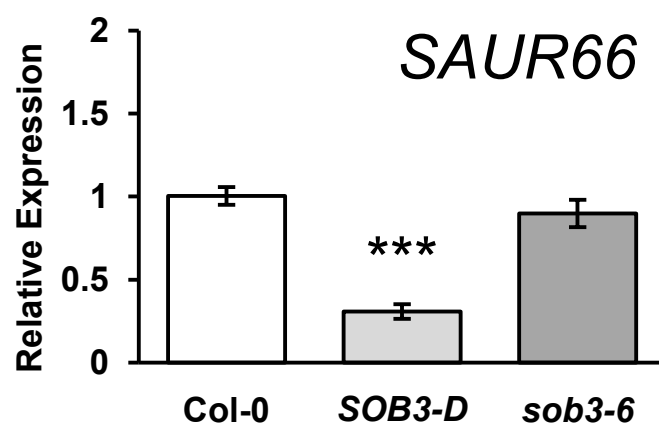

**Supplemental Figure 5: SAUR Genes are Repressed in SOB3-D at Six Days.** Relative expression of SAUR genes in wild-type and homozygous mutant seedlings grown in dim white light, as determined by qRT-PCR. Transcript levels are normalized based on the expression of the *UBQ10* housekeeping gene. All values are shown as fold change compared to the wildtype. Error bars represent standard error of the mean for four biological replicates. In a Welch's *t*-test (unpaired two-tailed *t*-test with unequal variance) compared to the WT \*\* $P < 0.01$ . \*\*\* $P < 0.001$ .

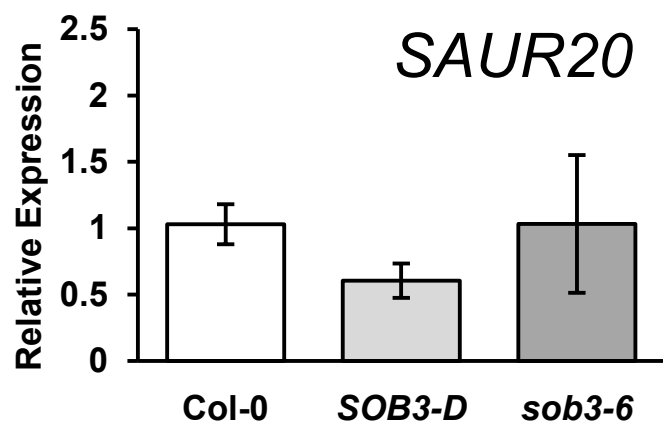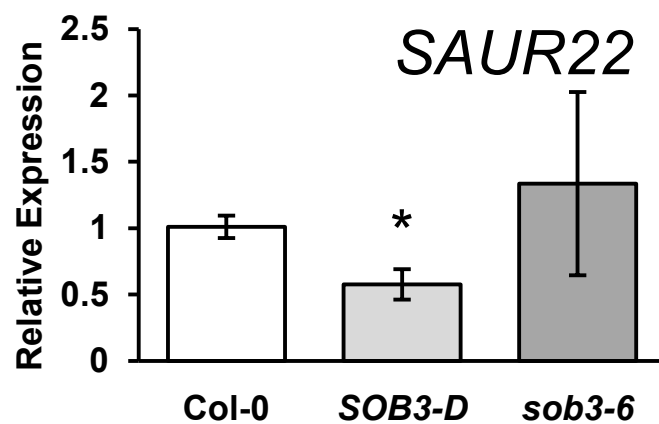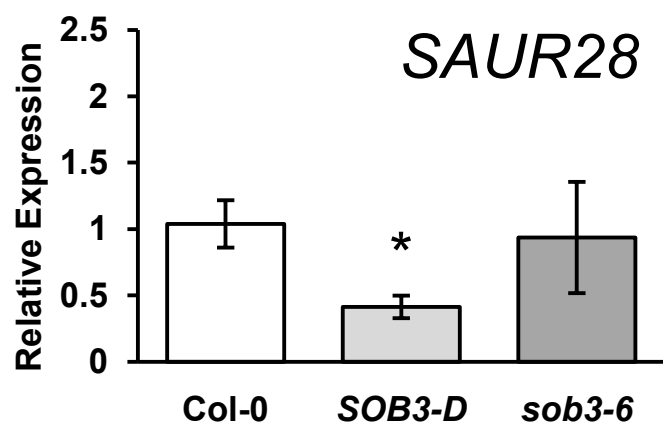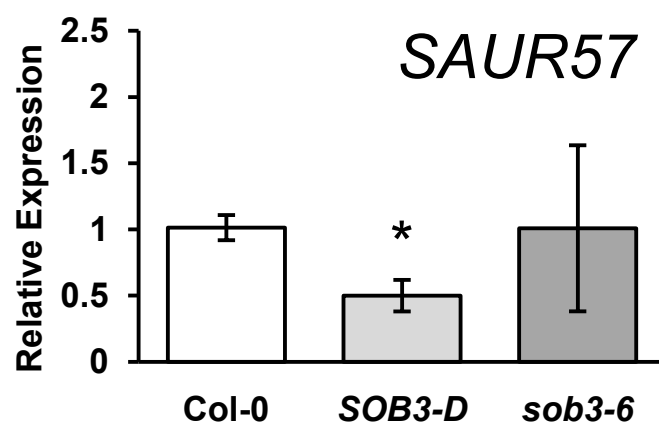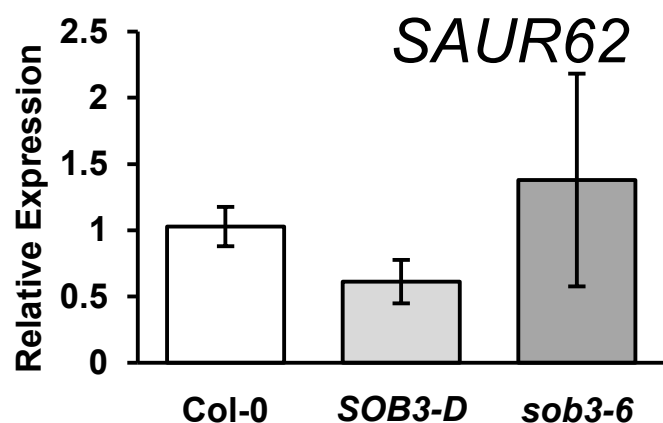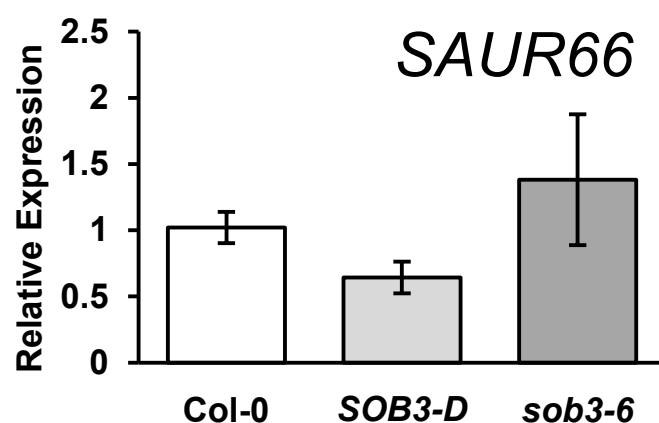

**Supplemental Figure 6: SAUR Genes are Down-regulated in SOB3-D Seedlings Grown in Far-red Light.** Relative expression of SAUR genes in wild-type and homozygous mutant seven-day-old seedlings grown in 6  $\mu\text{mol}/\text{m}^2/\text{sec}$  far-red light, as determined by qRT-PCR. Transcript levels are normalized based on the expression of the *PP2AA3* housekeeping gene. All values are shown as fold change compared to the wildtype. Error bars represent standard error of the mean for three or four biological replicates. In a Welch's *t*-test (unpaired two-tailed *t*-test with unequal variance compared to the WT)  $*P < 0.05$ .

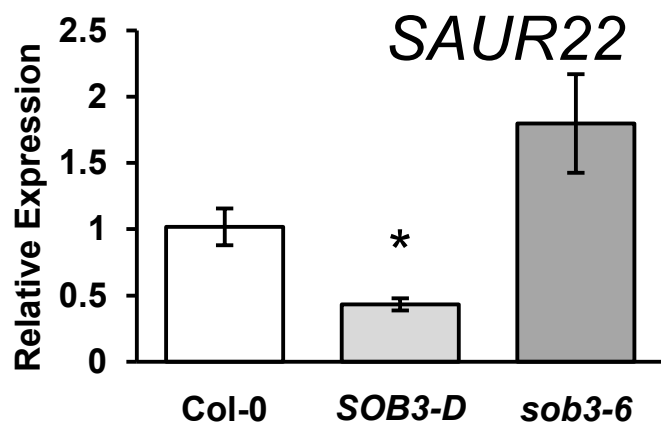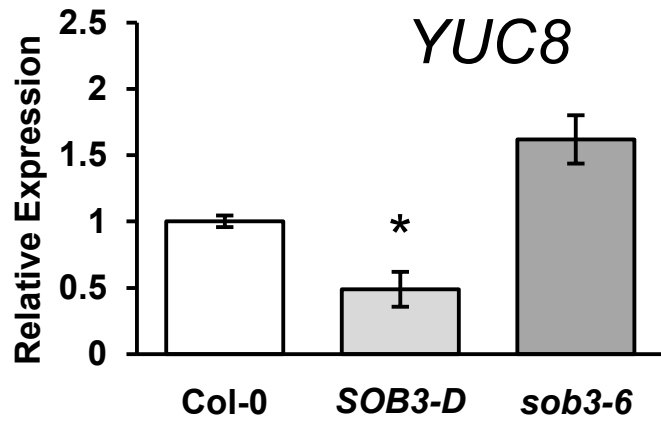

**Supplemental Figure 7: *SAUR22* and *YUC8* Expression Patterns in *SOB3* Mutants at Five Days.** Relative expression of genes associated with auxin signaling in Col-0 and homozygous *SOB3-D* and *sob3-6* seedlings, as determined by qRT-PCR analysis. All seedlings were grown in dim white light. Transcript levels are normalized based on the expression of either the *MDAR4* (*YUC8*) or *PMP* (*SAUR22*) housekeeping gene. All values are shown as fold change compared to the wildtype. Error bars represent standard error of the mean from three biological replicates. In a Welch's *t*-test (unpaired two-tailed *t*-test with unequal variance) compared to the WT \**P* < 0.05.

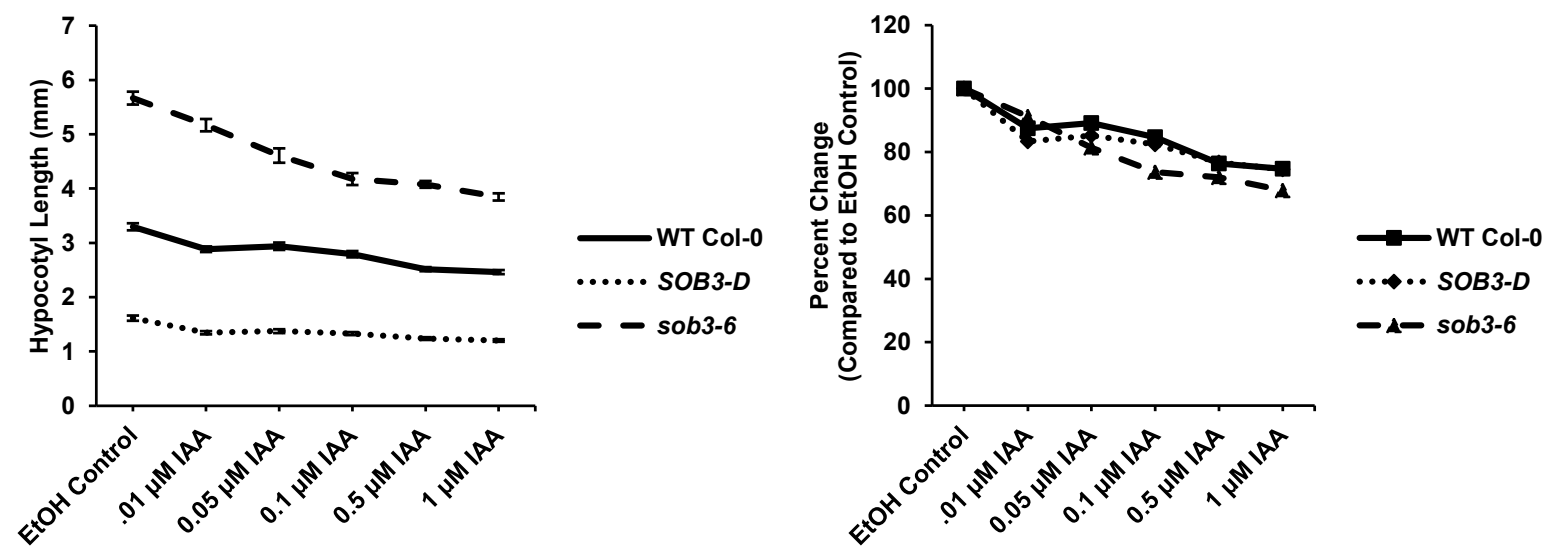

**Supplemental Figure 8: Responses of *SOB3* Mutants to Exogenous IAA.** Hypocotyl growth of seedlings grown in dim white light for six days on LS media containing the specified concentrations of IAA. Values represent the mean of either the actual measured hypocotyl length (left) or the sensitivity to treatment (right) calculated as percent change compared to the same genotype on the EtOH control plates. Error bars represent standard error of the mean. EtOH- Col-0,  $n = 58$ , *SOB3-D*,  $n = 48$ ; *sob3-6*,  $n = 65$ . 0.01  $\mu$ M IAA- Col-0,  $n = 72$ ; *SOB3-D*,  $n = 54$ ; *sob3-6*,  $n = 61$ . 0.05  $\mu$ M IAA- Col-0,  $n = 69$ ; *SOB3-D*,  $n = 65$ ; *sob3-6*,  $n = 54$ . 0.1  $\mu$ M IAA- Col-0,  $n = 65$ ; *SOB3-D*,  $n = 54$ ; *sob3-6*,  $n = 62$ . 0.5  $\mu$ M IAA- Col-0,  $n = 62$ ; *SOB3-D*,  $n = 56$ ; *sob3-6*,  $n = 69$ . 1  $\mu$ M IAA- Col-0,  $n = 58$ ; *SOB3-D*,  $n = 47$ ; *sob3-6*,  $n = 59$ .

# SOB3 Expression

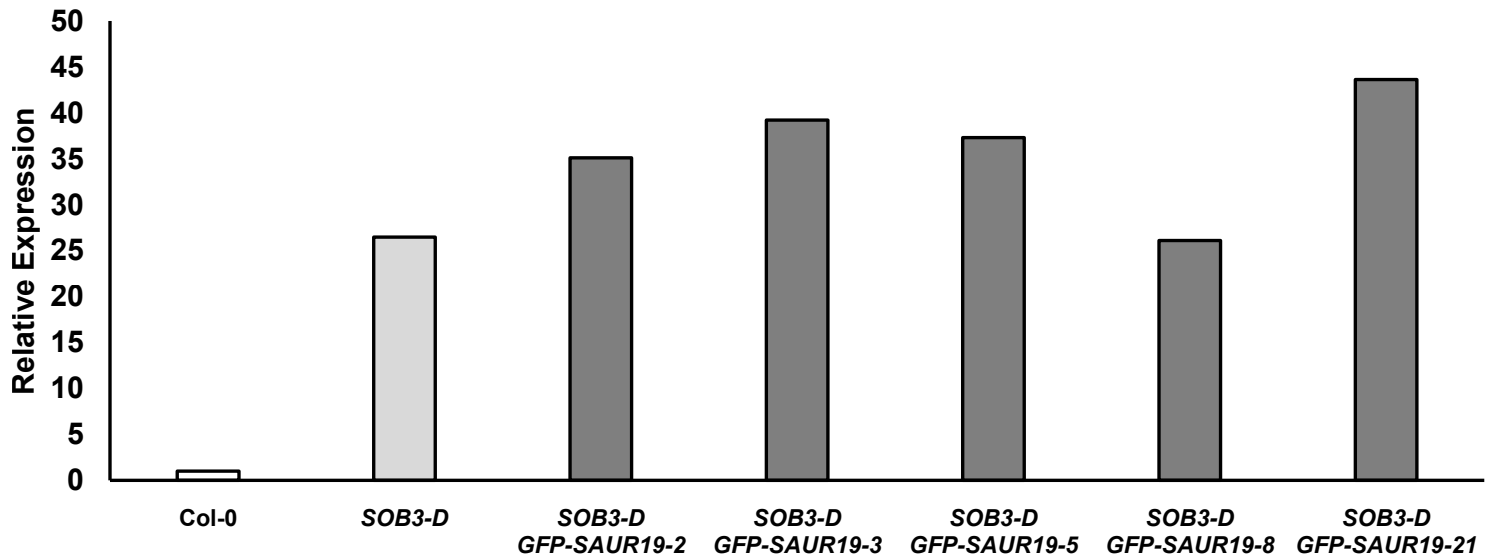

**Supplemental Figure 9: SOB3 Expression in SOB3-D/GFP-SAUR19 Seedlings.** Expression levels were analyzed via qRT-PCR using six-day-old seedlings grown in dim white light. All lines, excluding Col-0, are homozygous at the *SOB3-D* locus. In regards to the *GFP-SAUR19* transgene, these lines are T2 generation plants. Transcript levels are normalized based on the *MDAR4* housekeeping gene. All values are shown as fold change compared to the WT. For each genotype, approximately 20 seedlings were harvested and pooled together into a single sample for RNA extraction and subsequent cDNA synthesis.

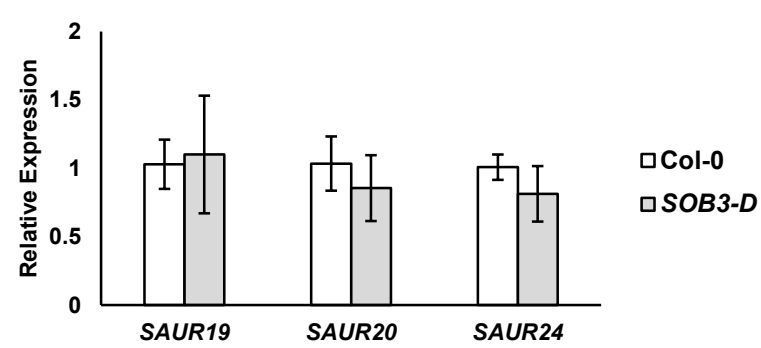

**Supplemental Figure 10: SAUR Expression in Rosettes Leaves.** Expression levels were analyzed via qRT-PCR using the plants pictured in Supplemental Figure 3A, for the indicated genotypes, at 28 days. Transcript levels are normalized based on the expression of the *MDAR4* housekeeping gene. *SOB3-D* values are depicted as fold-change compared to Col-0 for the same gene. Error bars represent standard error of the mean for three biological replicates.

A

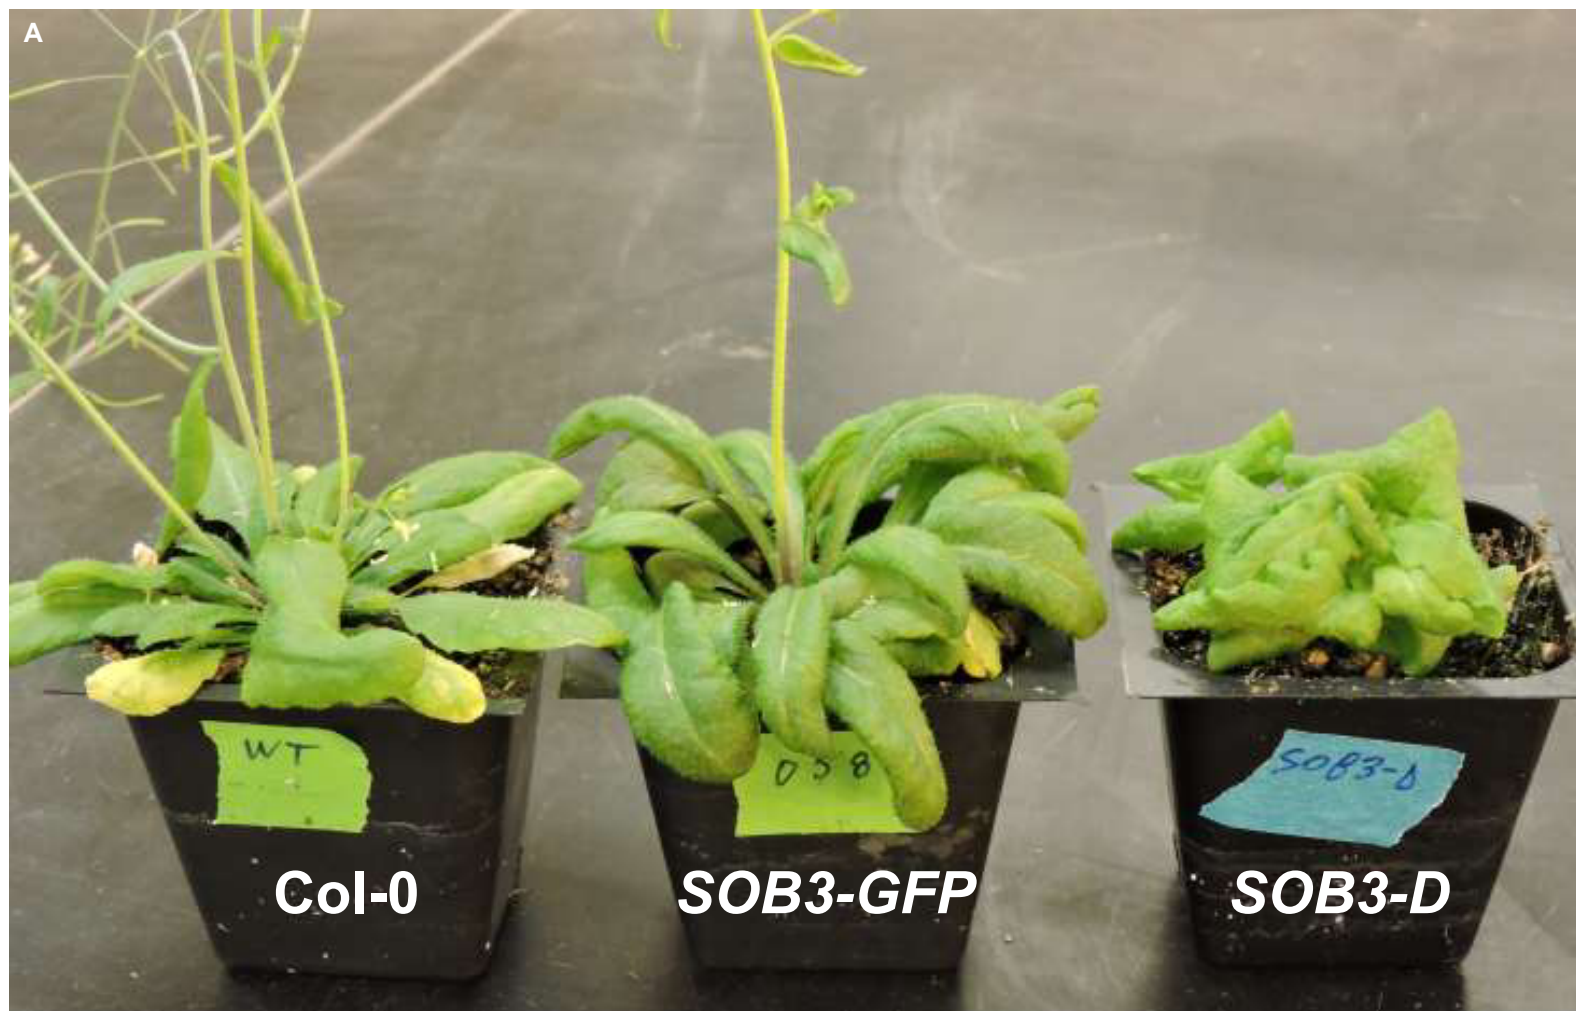

B

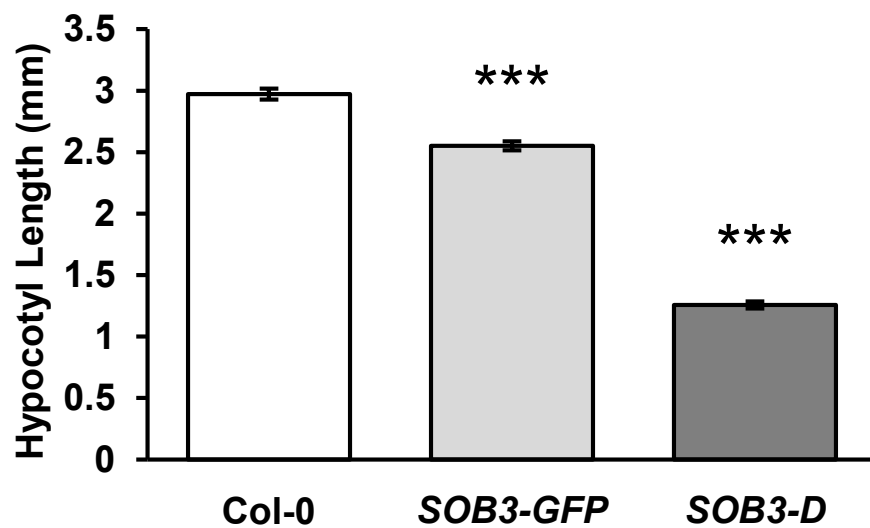

**Supplemental Figure 11: *SOB3-GFP* Phenotypes are Reminiscent of *SOB3-D*.** **A** - 44-day-old plants grown in long-day conditions under a moderate light intensity. **B** - Hypocotyl measurements performed with six-day-old seedlings grown on LS plates in dim white light. Mutants are homozygous. Error bars represent standard error of the mean. Col-0,  $n = 79$ ; *SOB3-GFP*,  $n = 101$ ; *SOB3-D*,  $n = 56$ . In a Welch's  $t$ -test (unpaired one-tailed  $t$ -test with unequal variance) compared to the WT \*\*\* $P < 0.001$ .

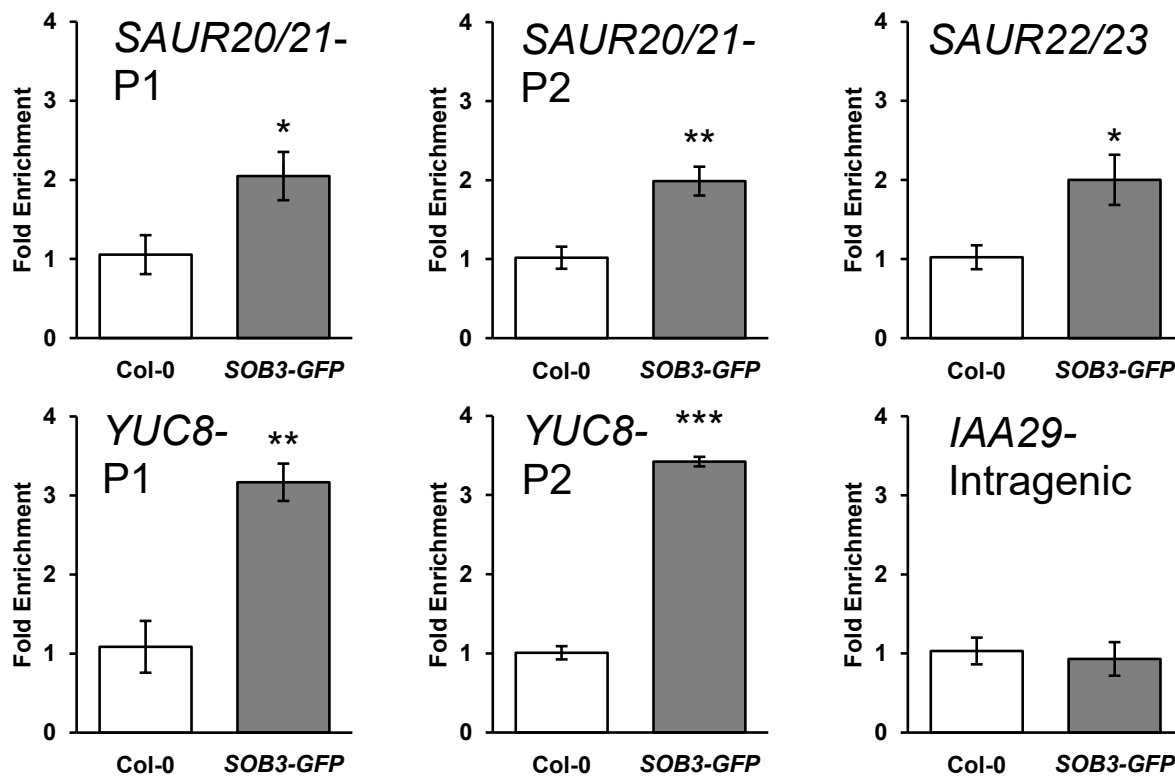

**Supplemental Figure 12: SOB3 Binding to SAUR and YUC8 Promoters.** Relative enrichment of various loci in WT or transgenic *SOB3-GFP* lines, using a ChIP-qPCR procedure employing an antibody against the GFP epitope. A separately-prepared set of ChIP samples was used as compared to Figures 5 and 6. All values are shown as fold change compared to the Col-0 control sample. Error bars represent standard error of the mean from three different ChIP preparations. In a Welch's *t*-test (unpaired one-tailed *t*-test with unequal variance) \**P* < 0.05. \*\**P* < 0.01. \*\*\**P* < 0.001.

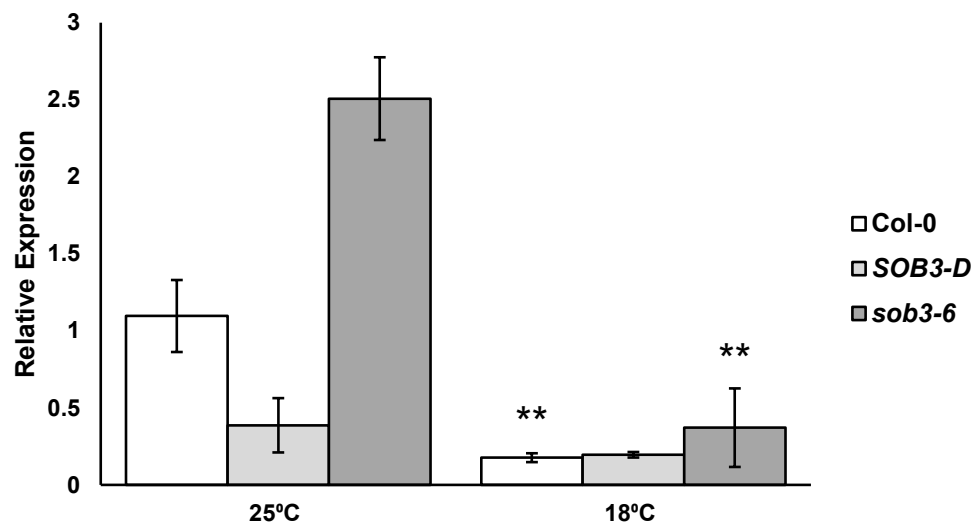

**Supplemental Figure 13: Comparison of SAUR22 Expression at 25°C and 18°C.**

SAUR22 expression in six-day-old dim white-light grown seedlings, as determined by qRT-PCR. Transcript levels are normalized based on the expression of the *MDAR4* housekeeping gene. All values are shown as fold change compared to the wildtype at 25°C. Error bars represent standard error of the mean from four or five biological replicates. In a Welch's *t*-test (unpaired two-tailed *t*-test with unequal variance) compared to the same genotype at 25°C **\*\**P* < 0.01**.
